# Supplementary material for: High frequency electrical stimulation reduces α-synuclein levels and α-synuclein-mediated autophagy dysfunction
Source: PubMed Central journal article supplement (PMC11245498; doi:10.1038/s41598-024-64131-3), 2024-07-12
Supplement: 41598_2024_64131_MOESM1_ESM.pdf [file 41598_2024_64131_MOESM1_ESM.pdf]

**HIGH FREQUENCY ELECTRICAL STIMULATION REDUCES  $\alpha$ -SYNUCLEIN LEVELS AND  $\alpha$ -SYNUCLEIN-MEDIATED AUTOPHAGY DYSFUNCTION**

Jimmy George, Kashfia Shafiq, Minesh Kapadia, Lorraine V. Kalia and Suneil K. Kalia

## **SUPPLEMENTARY FIGURES**

**Fig S1. Western blots from SH-SY5Y cells treated with Bafilomycin A1 (40 nM) with and without HFS.**

**Panel A:** A full-length PVDF membrane of LC3-I and LC3-II bands with molecular weight ladders; cropped images of LC3-I and LC3-II bands indicated by the red box shown in Fig. 5g.

**Panel B:** The membrane in Panel A was stripped and exposed to anti-GAPDH; cropped images of GAPDH bands indicated by the red box shown in Fig. 5g.

**A**

1 2 3 4 5 6

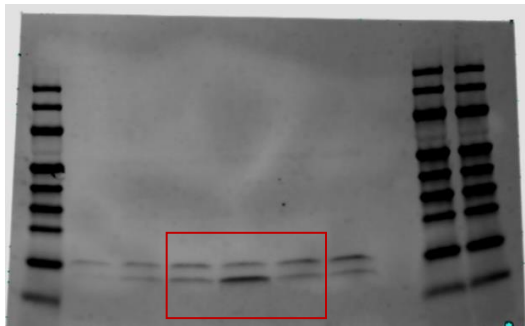

**B**

1 2 3 4 5 6

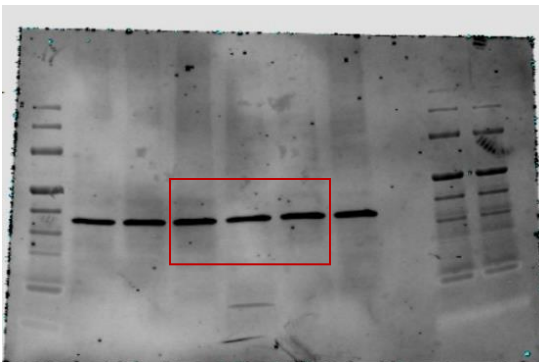

1. DMSO
2. DMSO
3. DMSO
4. BAF Non-stimulated
5. BAF Stimulated
6. BAF Stimulated
